# Supplementary material for: Why do physicians practice osteopathic manipulative treatment (OMT)? A survey study
Source: publisher site journal article supplement (doi:10.1515/jom-2023-0288), 2024-09-10
Supplement: Supplementary file 1 [file j_jom-2023-0288_suppl_001.docx]

**Physician & Resident Survey**

During your 1st and 2nd year of Osteopathic medical school, were you able to treat with OMT people who were NOT your lab partners in a setting or events offered by your school such as an OFL, TOPPS, or other similar event?

- Yes
- No

What is your interest in utilizing OMM in your future practice?

- 1 - Not interested
- 2
- 3
- 4
- 5
- 6
- 7
- 8
- 9 - Very interested

If you are interested in utilizing OMM in your future practice, please state why (choose all that apply)?

|  | Choose all that apply |
| --- | --- |
| 1. You participated in a TOPPS or other event described above |  |
| 2. Someone treated you with OMM yielding positive results |  |
| 3. You saw OMM produce good responses on patients |  |
| 4. You treated with OMM and saw good responses on the participant |  |
| 5. The OMM principles make sense to you medically |  |
| 6. Other (please specify) |  |
| I did not participate in TOPPS or similar event |  |

If you are NOT interested in utilizing OMM in your future practice, please state why (choose all that apply)?

|  | Choose all that apply |
| --- | --- |
| 1. You did NOT participate in a TOPPS or other event described above |  |
| 2. The OMM principles do NOT make sense to you medically |  |
| 3. Someone treated you with OMM yielding negative results, or no help at all |  |
| 4. You saw OMM produce bad responses on patients |  |
| 5. You treated with OMM and did not see good responses on the participant |  |
| Other (please specify) |  |
| I participated in TOPPS or similar event |  |

If you did participate in TOPPS or other similar event, what skills do you think you gained through that experience? (choose all that apply)

|  | Choose all that apply |
| --- | --- |
| Problem-solving of somatic dysfunctions |  |
| Correlating medical diagnoses to relevant somatic dysfunctions |  |
| More effective treatment of somatic dysfunctions |  |
| Diagnostic accuracy of somatic dysfunctions |  |
| Other (please specify) |  |
| I did not participate in TOPPS or similar event |  |

**Student Survey**

During your 1st and 2nd year of Osteopathic medical school, were you able to treat with OMT people who were NOT your lab partners in a setting or events offered by your school such as an OFL, TOPPS or other similar event?

- Yes
- No

What is your interest in utilizing OMM in your future practice?

- 1 - Not interested
- 2
- 3
- 4
- 5
- 6
- 7
- 8
- 9 - Very interested

If you are interested in utilizing OMM in your future practice, please state why (choose all that apply)?

|  | Choose all that apply |
| --- | --- |
| 1. You participated in a TOPPS or other event described above |  |
| 2. Someone treated you with OMM yielding positive results |  |
| 3. You saw OMM produce good responses on patients |  |
| 4. You treated with OMM and saw good responses on the participant |  |
| 5. The OMM principles make sense to you medically |  |
| 6. Other (please specify) |  |
| I did not participate in TOPPS or similar event |  |

If you are NOT interested in utilizing OMM in your future practice, please state why (choose all that apply)?

|  | Choose all that apply |
| --- | --- |
| 1. You did NOT participate in aTOPPS or other event described above |  |
| 2. The OMM principles do NOT make sense to you medically |  |
| 3. Someone treated you with OMM yielding negative results, or no help at all |  |
| 4. You saw OMM produce bad responses on patients |  |
| 5. You treated with OMM and did not see good responses on the participant |  |
| Other (please specify) |  |
| I participated in TOPPS or similar event |  |

If you did participate in TOPPS or other similar event, what skills do you think you gained through that experience? (choose all that apply)

|  | Choose all that apply |
| --- | --- |
| Problem-solving of somatic dysfunctions |  |
| Correlating medical diagnoses to relevant somatic dysfunctions |  |
| More effective treatment of somatic dysfunctions |  |
| Diagnostic accuracy of somatic dysfunctions |  |
| Other (please specify) |  |
| I did not participate in TOPPS or similar event |  |
